# Supplementary material for: The long-range convergence of the energetic properties of the water monomer in bulk water at room temperature
Source: Royal Society of Chemistry journal article supplement (doi:10.1039/c7cp03183a), 2017-01-01
Supplement: c7cp03183a1.pdf [file c7cp03183a1.pdf]

# **Electronic Supplementary Information (ESI)**

## **The long-range convergence of the energetic properties of the water monomer in bulk water at room temperature**

Stuart J. Davie, Peter Maxwell, Paul L. A. Popelier\*

Manchester Institute of Biotechnology (MIB), 131 Princess Street, Manchester M1 7DN, Great Britain

and

School of Chemistry, University of Manchester, Oxford Road, Manchester M13 9PL, Great Britain

### **Corresponding Author**

paul.popelier@manchester.ac.uk, +44 161 3064511

# ENERGIES

Total molecular energy

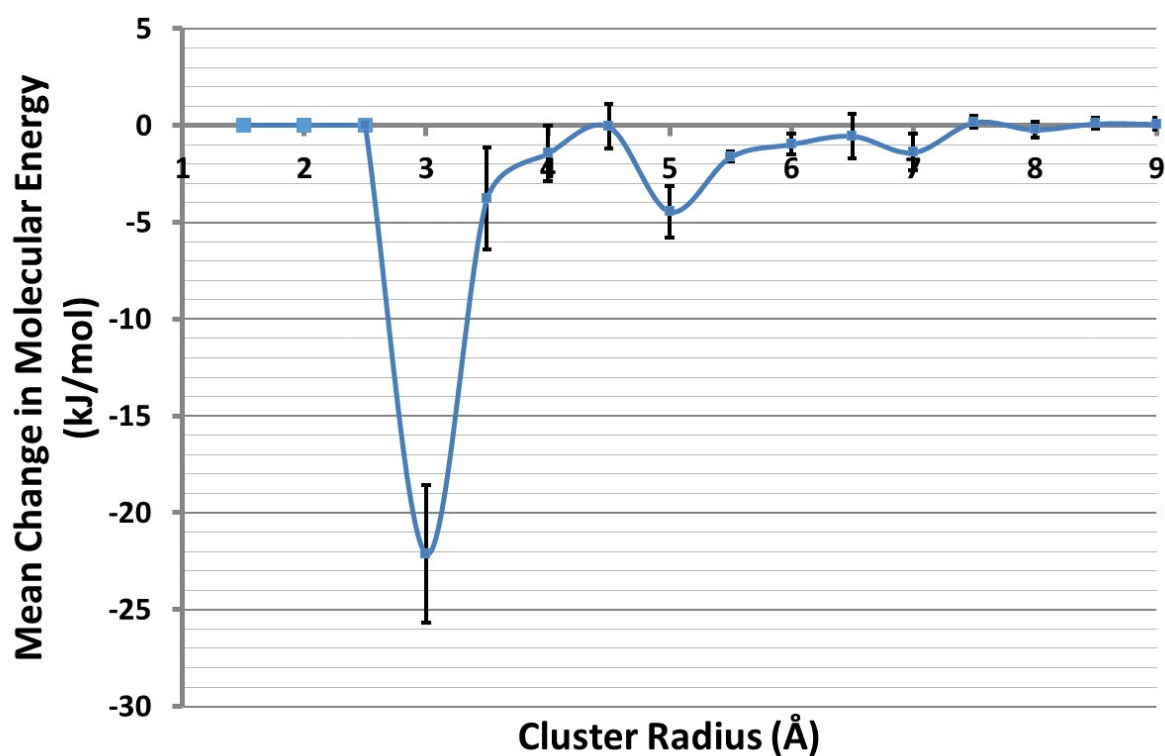

**Figure ESI1.** Mean change in total IQA molecular energy of a water monomer inside a water cluster (relative to the isolated monomer's energy, which is set to zero). Error bars represent  $\pm 1$  standard deviation.

## Atomic self-energy

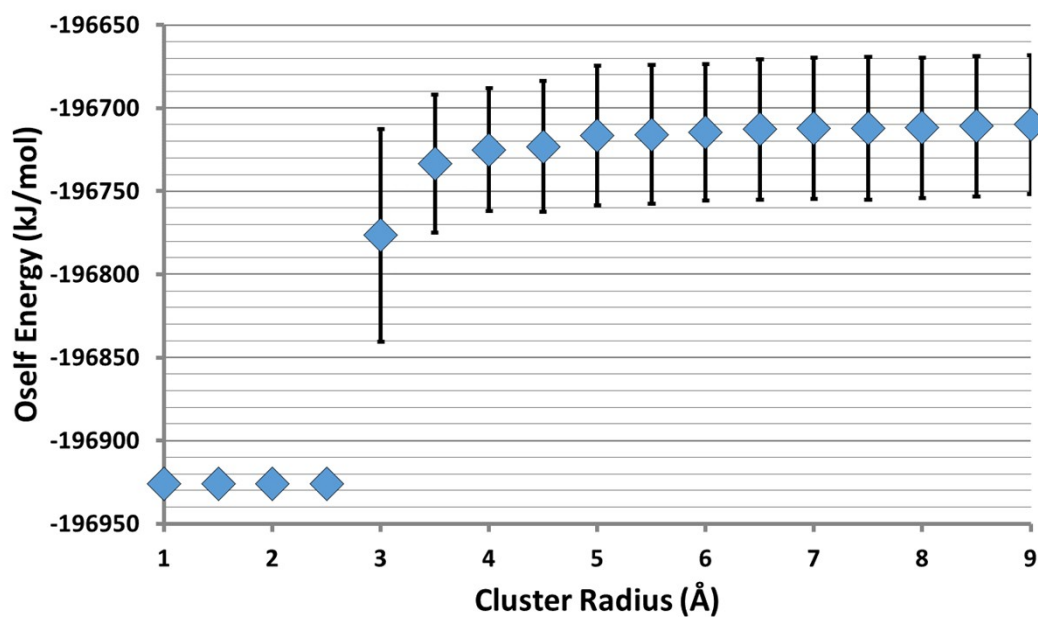

**Figure ESI2.** Mean oxygen IQA self-energy. Error bars represent  $\pm 1$  standard deviation.

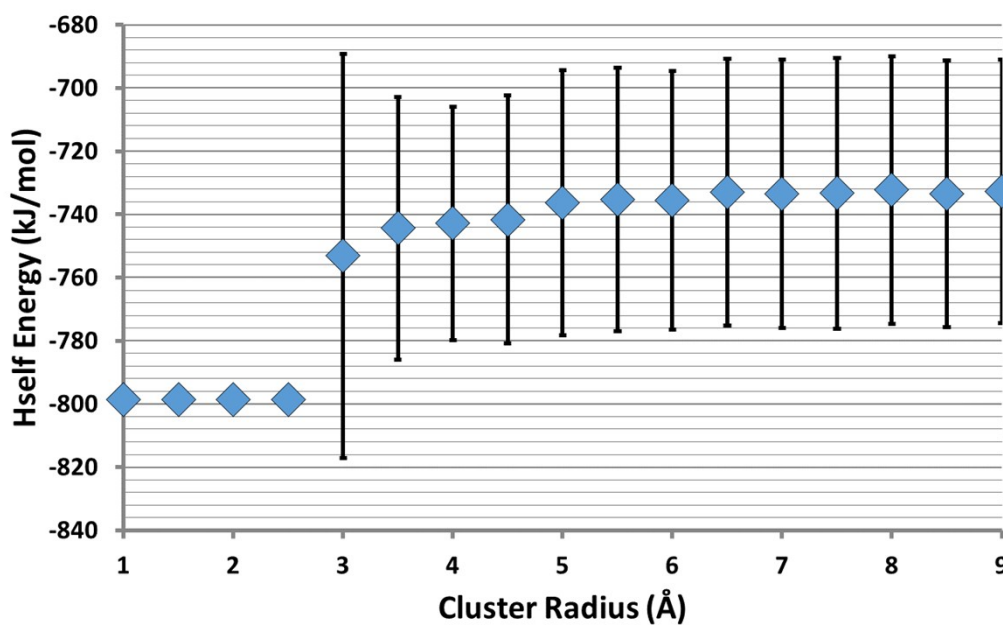

**Figure ESI3.** Mean hydrogen IQA self-energy. Error bars represent  $\pm 1$  standard deviation.

## Atomic interaction energy

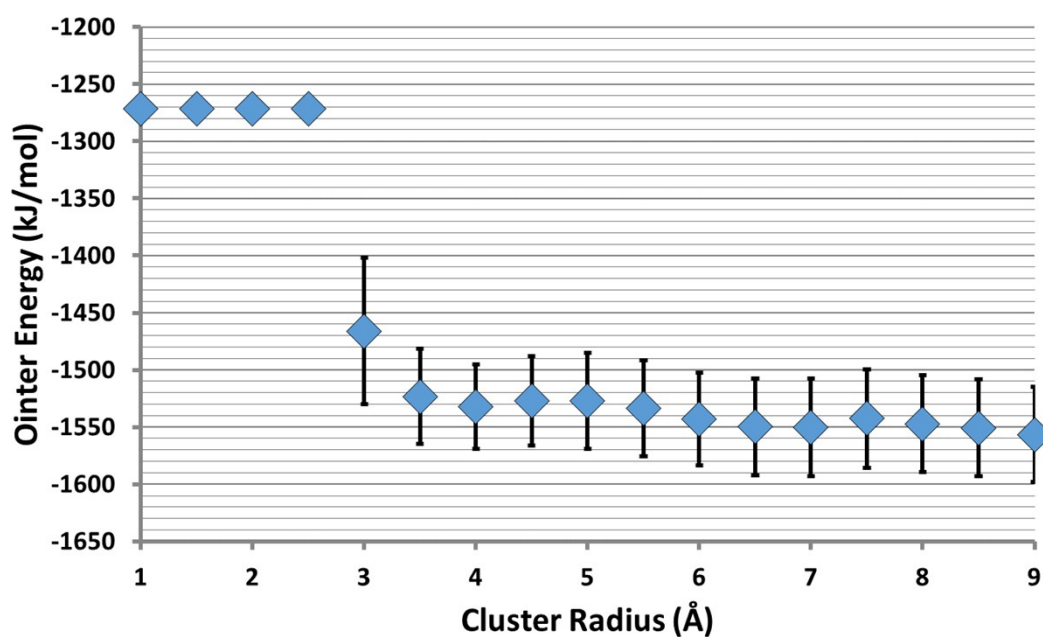

**Figure ESI4.** Mean oxygen IQA interaction energy. Error bars represent  $\pm 1$  standard deviation.

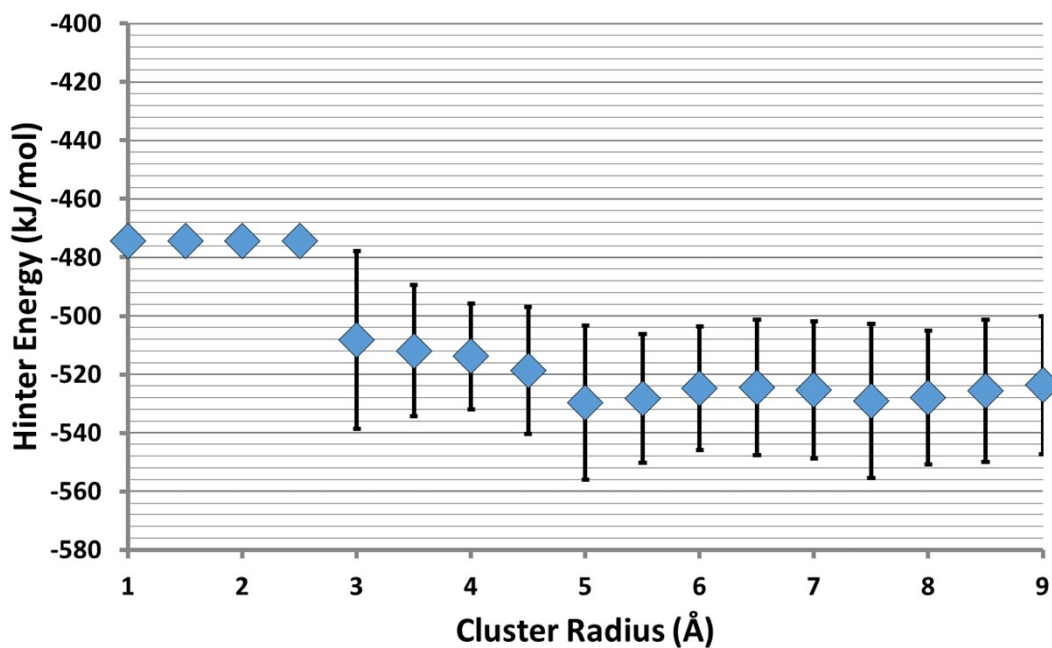

**Figure ESI5.** Mean hydrogen IQA interaction energy. Error bars represent  $\pm 1$  standard deviation.

## Atomic exchange energy

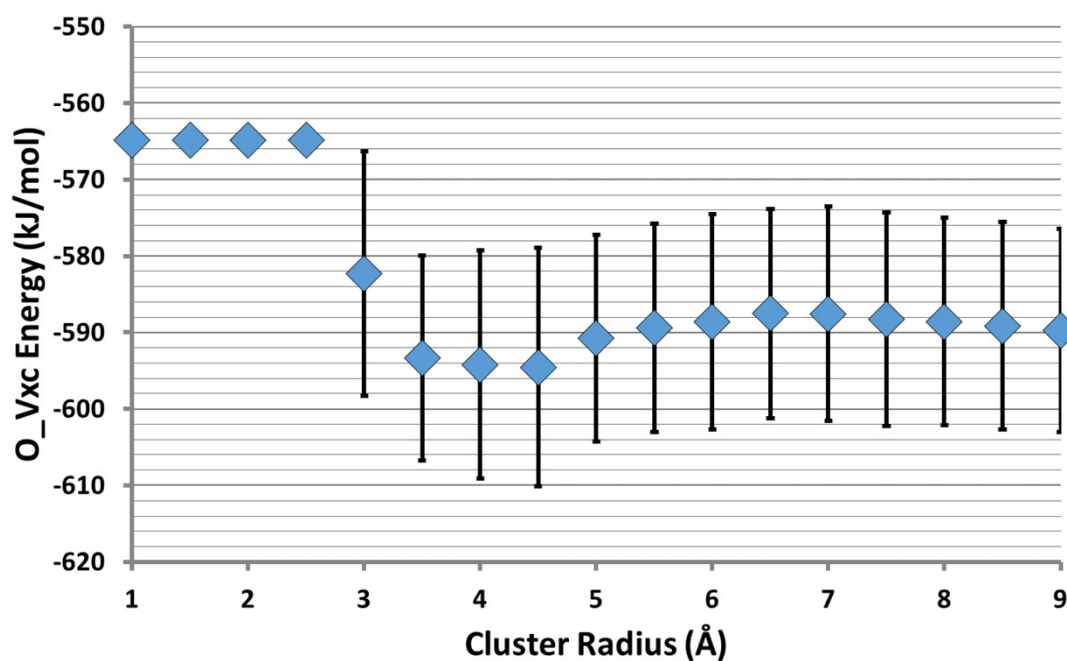

**Figure ESI6.** Mean oxygen IQA exchange-correlation energy. Error bars represent  $\pm 1$  standard deviation.

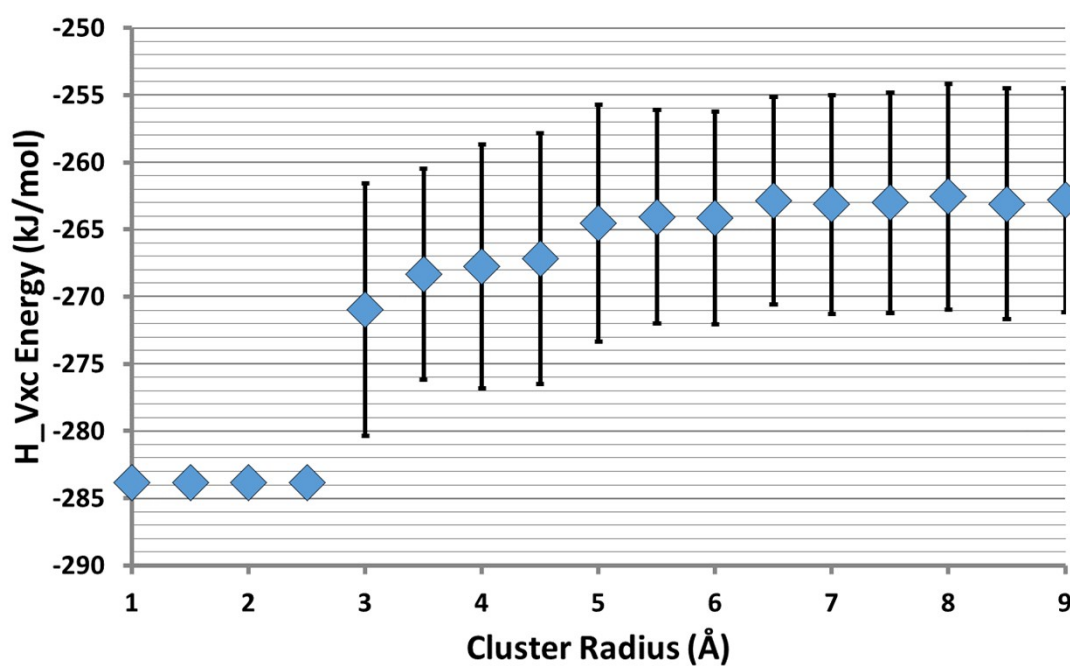

**Figure ESI7.** Mean hydrogen IQA exchange-correlation energy. Error bars represent  $\pm 1$  standard deviation.

## Atomic classical electrostatic energy

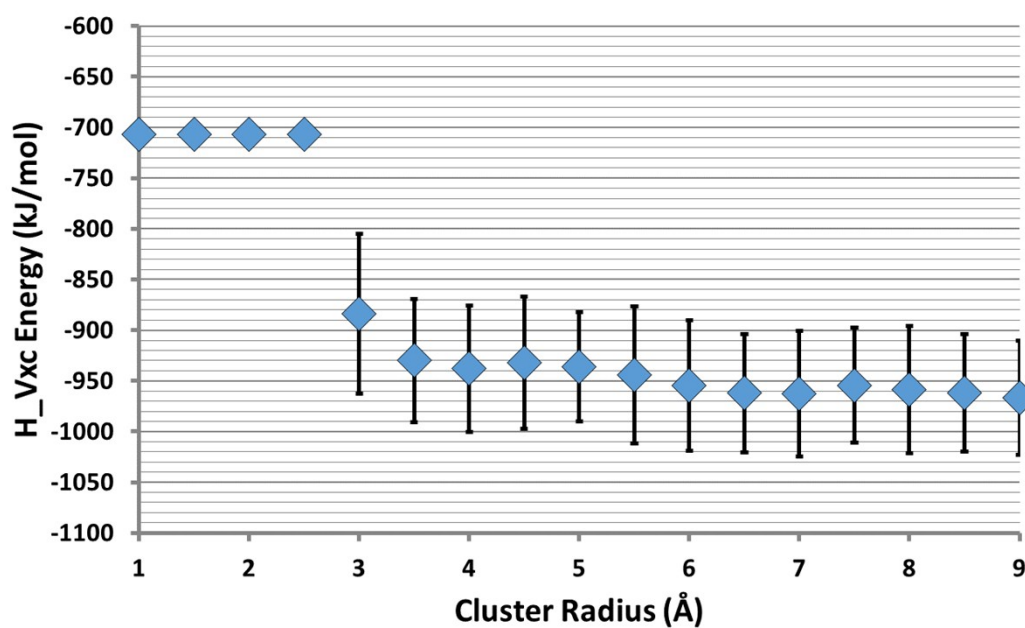

**Figure ESI8.** Mean oxygen IQA classical electrostatic energy. Error bars represent  $\pm 1$  standard deviation.

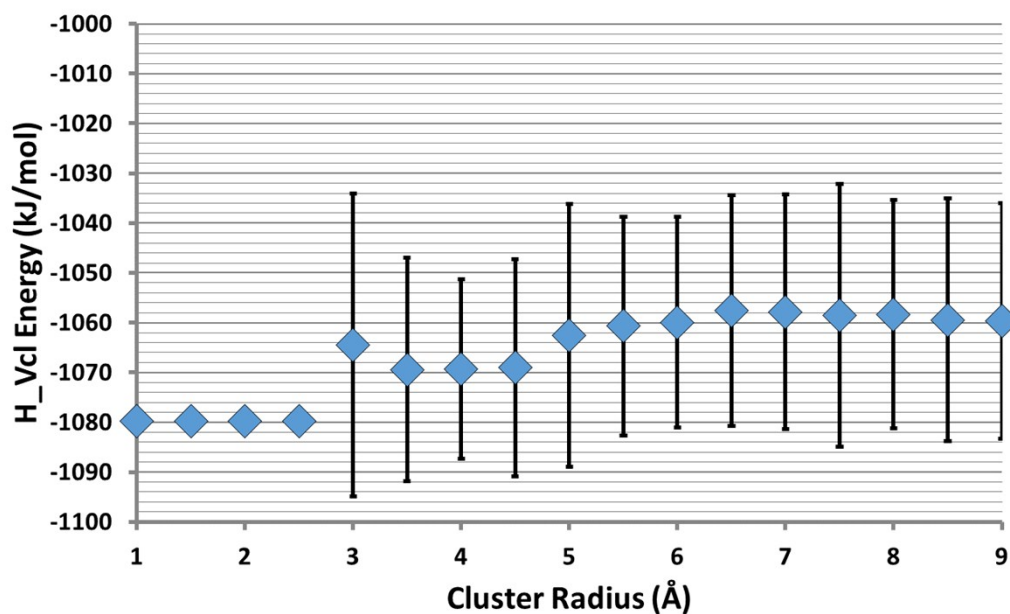

**Figure ESI9.** Mean hydrogen IQA classical electrostatic energy. Error bars represent  $\pm 1$  standard deviation.

# MULTIPOLE MOMENTS

## Dipole Moment

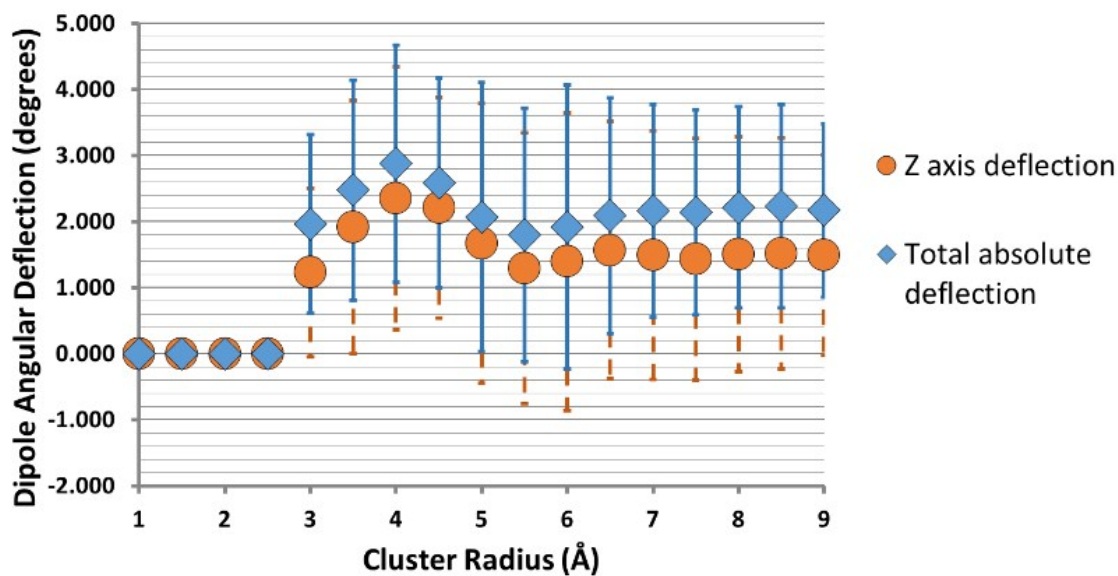

**Figure ESI10.** Deflection of the molecular dipole moment. Blue represents that absolute deflection with respect to the initial vector, while orange represents the deflection in the z-axis (i.e. out of the HOH plane). Error bars represent  $\pm 1$  standard deviation.

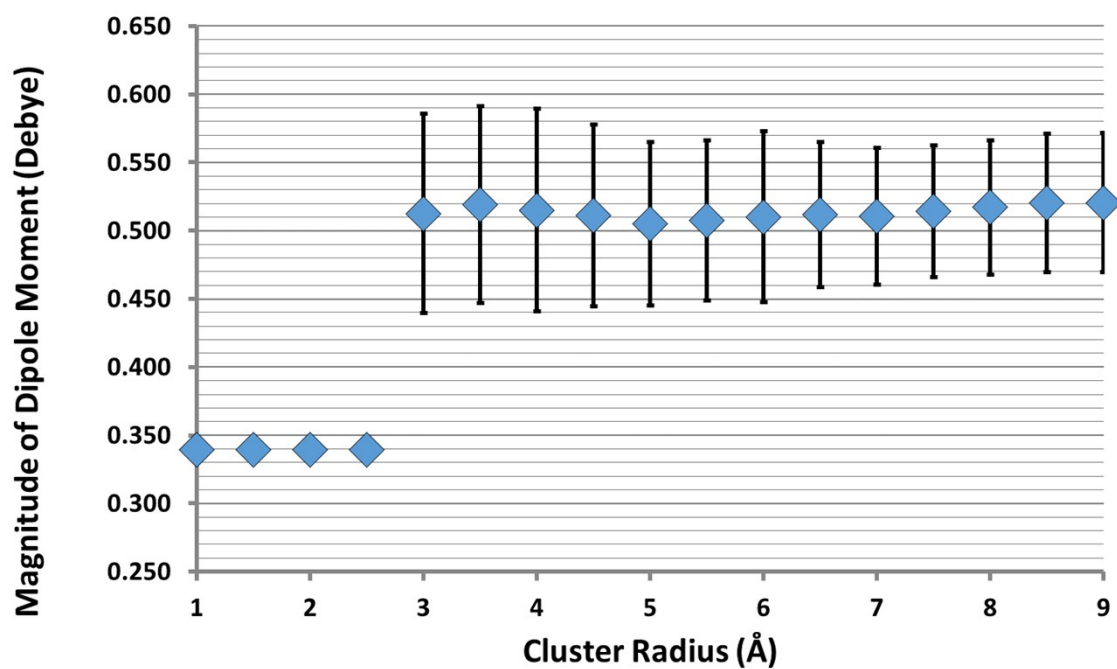

**Figure ESI11.** Mean magnitude of the dipole moment of the central oxygen atom. Error bars represent  $\pm 1$  standard deviation.

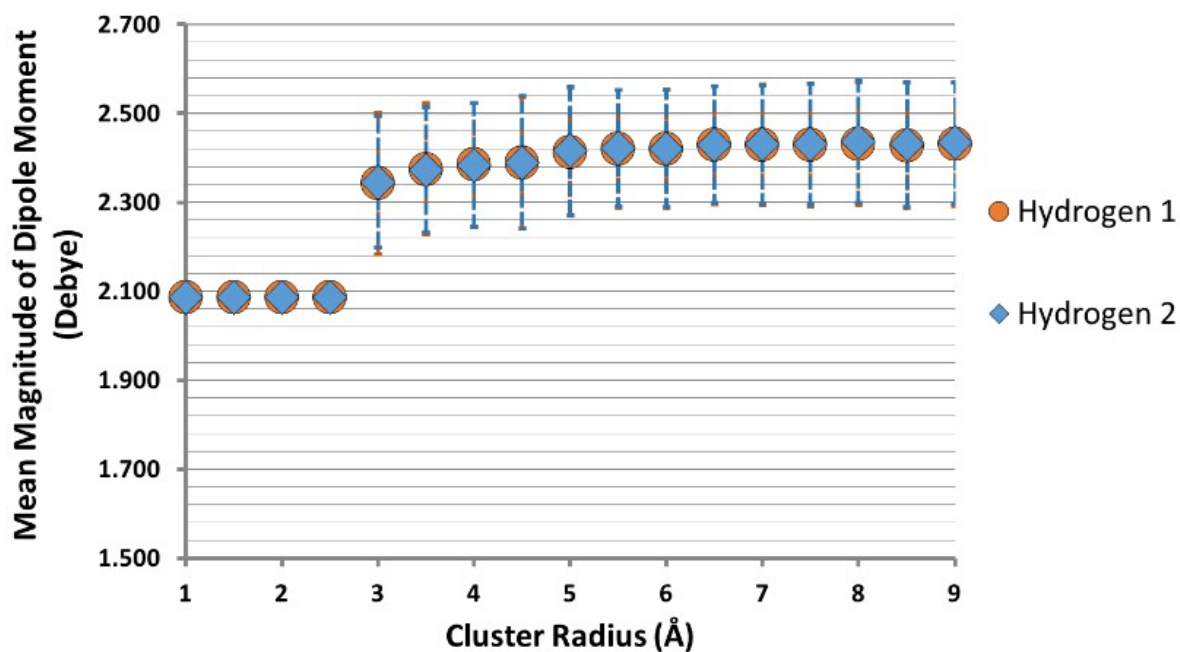

**Figure ESI12.** Mean magnitude of the dipole moment of the hydrogen atoms of the central molecule. Error bars represent  $\pm 1$  standard deviation.



## Quadrupole Moment

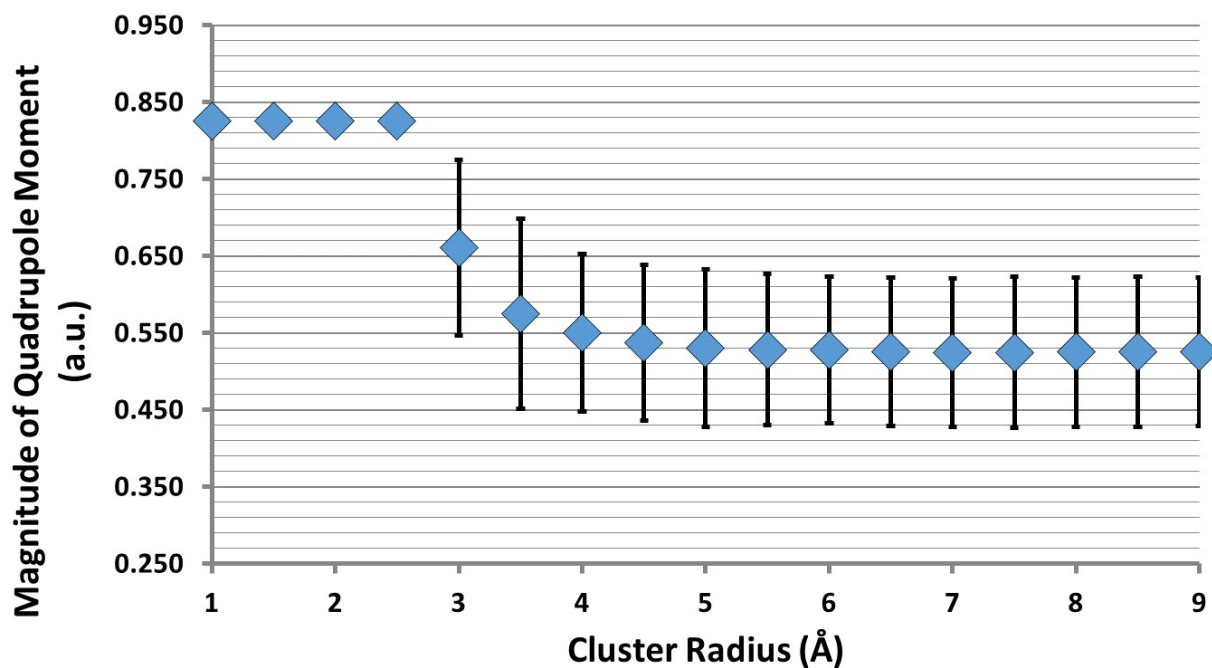

**Figure ESI13.** Mean magnitude of the quadrupole moment of the oxygen atom of the central molecule. Error bars represent  $\pm 1$  standard deviation.

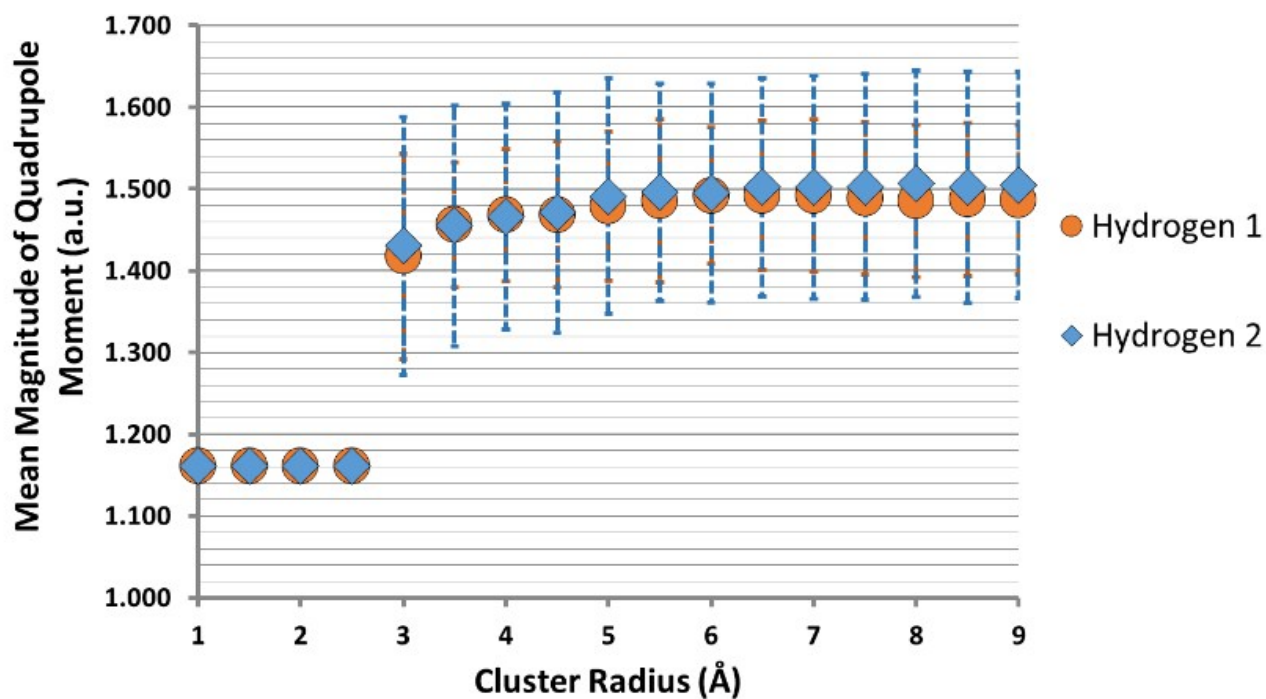

**Figure ESI14.** Mean magnitude of the quadrupole moment of the hydrogen atoms of the central molecule. Error bars represent  $\pm 1$  standard deviation.
